# Supplementary material for: Enhanced propionic acid production from whey lactose with immobilized Propionibacterium acidipropionici and the role of trehalose synthesis in acid tolerance
Source: Royal Society of Chemistry journal article supplement (doi:10.1039/c4gc01256a), 2014-08-13
Supplement: c4gc01256a1.pdf [file c4gc01256a1.pdf]

Table S1. Bacterial strains and plasmids used in this work

| Strain or plasmid                                                | Description                                                                                                                                                   | Source or reference                                                  |
|------------------------------------------------------------------|---------------------------------------------------------------------------------------------------------------------------------------------------------------|----------------------------------------------------------------------|
| <i>Propionibacterium acidipropionici</i> 1.2232<br>$\Delta otsA$ | Wild type<br>$\Delta otsA::\Omega$ : Wild type with insertion of $\Omega$ cassette and deletion in the <i>otsA</i> ORF                                        | China General Microbiological Culture Collection Center<br>This work |
| $\Delta treY$                                                    | $\Delta treY::\Omega$ : Wild type with insertion of $\Omega$ cassette and deletion in the <i>treY</i> ORF                                                     | This work                                                            |
| $\Delta otsA\Delta treY$                                         | $\Delta otsA::\Omega/\Delta treY$ : Wild type with deletion in the <i>otsA</i> and <i>treY</i> ORFs and insertion of $\Omega$ cassette in the <i>otsA</i> ORF | This work                                                            |
| <i>E. coli</i>                                                   |                                                                                                                                                               |                                                                      |
| DH5 $\alpha$                                                     | <i>supE44\Delta lacUI169</i> ( $\Phi 80$ <i>lacZ\Delta M15</i> ) <i>hsdR17 recA1 endA1 gyrA96 thi-1 relA1</i> $\lambda^-$                                     | Vazyme Biotech (Nanjing) Co., Ltd.                                   |
| JM109                                                            | <i>endA1 recA1 gyrA96 hsdR17 supE44\lambda^- \Delta (lac-proAB)/F'</i> [ <i>tra\Delta 36 proAB</i> <sup>+</sup> <i>lacZ\Delta M15</i> ]                       | Vazyme Biotech (Nanjing) Co., Ltd.                                   |
| JM109 ( $\lambda$ <i>pir</i> )                                   | JM109 lysogenized with $\lambda$ <i>pir</i> bacteriophage                                                                                                     | Vazyme Biotech (Nanjing) Co., Ltd.                                   |
| S17-1                                                            | <i>Tp<sup>r</sup>Sm<sup>r</sup> hsdR pro recA</i> RP4-2-Tc::Mu-Km::Tn 7 in chromosome                                                                         | Vazyme Biotech (Nanjing) Co., Ltd.                                   |
| S17-1 ( $\lambda$ <i>pir</i> )                                   | S17-1 lysogenized with $\lambda$ <i>pir</i> bacteriophage                                                                                                     | Vazyme Biotech (Nanjing) Co., Ltd.                                   |
| Plasmid                                                          |                                                                                                                                                               |                                                                      |
| pBluescript II SK+                                               | <i>Ap<sup>r</sup></i> ; cloning vector                                                                                                                        | Stratagene                                                           |
| pTK106                                                           | <i>Ap<sup>r</sup> Sm<sup>r</sup>/Spc<sup>r</sup></i> ; source of the <i>Sm<sup>r</sup>/Spc<sup>r</sup></i> gene ( $\Omega$ cassette)                          | Prentki and Krisch (1984)                                            |
| pJP5603                                                          | <i>Km<sup>r</sup></i> ; R6K-based suicide vector                                                                                                              | Kai M. Thormann et al. (2004)                                        |
| pHSGSKm                                                          | <i>Cm<sup>r</sup>Km<sup>r</sup></i> ; pHSG396 carrying the <i>Km<sup>r</sup></i> gene and <i>sacRsacB</i>                                                     | Masuda et al. (2002)                                                 |
| pJPMobsac                                                        | <i>Km<sup>r</sup></i> ; R6K-based suicide vector carrying <i>sacRsacB</i>                                                                                     | This work                                                            |
| pBOTSA I                                                         | pBII with PCR fragment containing upstream of <i>otsA</i>                                                                                                     | This work                                                            |
| pBOTSA II                                                        | pBII with PCR fragments containing upstream and downstream of <i>otsA</i>                                                                                     | This work                                                            |

---

|                        |                                                                                |           |
|------------------------|--------------------------------------------------------------------------------|-----------|
| pBOTSAX                | pBOTSA II with $\Omega$ cassette insertion between PCR fragments               | This work |
| pJPOTSA                | pJP5603 carrying PCR fragments of <i>otsA</i> with $\Omega$ cassette insertion | This work |
| pBTREY I               | pBII with PCR fragment containing upstream of <i>treY</i>                      | This work |
| pBTREY II              | pBII with PCR fragments containing upstream and downstream of <i>treY</i>      | This work |
| pBTREYX                | pBOTSA II with $\Omega$ cassette insertion between PCR fragments               | This work |
| pJPTREY                | pJP5603 carrying PCR fragments of <i>treY</i> with $\Omega$ cassette insertion | This work |
| pJP <i>mobsac</i> TREY | pJP <i>mobsac</i> carrying PCR fragments of <i>treY</i>                        | This work |

---
